# Supplementary material
Source: PubMed Central journal article supplement (PMC7963871)
Supplement: 16-00119.pdf [file 16-00119.pdf]

**On-line Table 1: Indications for imaging in adult populations**

| Symptom                     | Examples of Diagnostic Guidelines and Clinical Decision Rules                                                                                                                                   | Indications for Imaging                                                                                                                                                                                                                                                                                                                                                                                                                                                                                                                                                                                                                                                                                                                                                                                                                                                                                                                          | First-Line Imaging Modality                                                                                                                                                                                        | Settings in Which Imaging Can Be Avoided (or Insufficient Evidence)                                                                                                                      |
|-----------------------------|-------------------------------------------------------------------------------------------------------------------------------------------------------------------------------------------------|--------------------------------------------------------------------------------------------------------------------------------------------------------------------------------------------------------------------------------------------------------------------------------------------------------------------------------------------------------------------------------------------------------------------------------------------------------------------------------------------------------------------------------------------------------------------------------------------------------------------------------------------------------------------------------------------------------------------------------------------------------------------------------------------------------------------------------------------------------------------------------------------------------------------------------------------------|--------------------------------------------------------------------------------------------------------------------------------------------------------------------------------------------------------------------|------------------------------------------------------------------------------------------------------------------------------------------------------------------------------------------|
| Mild traumatic brain injury | New Orleans Criteria <sup>79a</sup><br>Canadian Head CT Rule <sup>47a</sup><br>ACEP/CDC criteria <sup>16</sup><br>ACR Appropriateness Criteria <sup>17</sup>                                    | Any high-risk signs/symptoms:<br>Age older than 65 yr<br>GCS < 15<br>Seizure<br>Focal neurologic deficit<br>Oral anticoagulant use<br>Intoxication<br>Dangerous mechanism<br>Signs of basilar skull fracture<br>At least 2 episodes of vomiting<br>Amnesia before impact of > 30 min<br>Sudden onset, severe headache<br>Acute or chronic headache with unexplained abnormal findings on neurologic examination<br>Posttraumatic headache<br>Unilateral headache with suspected arterial dissection<br>Acute headache in high-risk patient (ie, immunocompromised)<br>New headache in elderly patient with suspected temporal arteritis<br>Acute back pain with "red flags":<br>Known suspected malignancy<br>Focal and/or progressive neurologic deficits<br>Low-velocity trauma<br>Concern for spinal infection or history of immunosuppression<br>Signs of cauda equina syndrome<br>Chronic back pain lasting >4–6 weeks; amenable to surgery | CT head (noncontrast)                                                                                                                                                                                              | All patients not meeting high-risk signs and symptoms according to clinical criteria                                                                                                     |
| Headache                    | Headache Consortium guidelines in migraine work-up <sup>21</sup><br>Multispecialty consensus on diagnosis and treatment of headache <sup>22</sup><br>ACR Appropriateness Criteria <sup>23</sup> | Chronic headache without new features and stable neurologic examination findings<br>Migraine headache with normal examination findings<br>Tension-type headaches (insufficient evidence)                                                                                                                                                                                                                                                                                                                                                                                                                                                                                                                                                                                                                                                                                                                                                         | CT head (noncontrast)<br>MRI head (with and without contrast)                                                                                                                                                      | Chronic headache without new features and stable neurologic examination findings<br>Migraine headache with normal examination findings<br>Tension-type headaches (insufficient evidence) |
| Low back pain               | ACP low back pain guidelines <sup>26</sup><br><i>Lancet</i> , "Imaging for Low-Back Pain" <sup>27</sup><br>ACR Appropriateness Criteria <sup>28</sup>                                           | Back pain without "red flags"<br>Uncomplicated back pain and/or radiculopathy<br>Back pain lasting <4–6 weeks or incomplete trial of therapy<br>Nonsurgical presentation                                                                                                                                                                                                                                                                                                                                                                                                                                                                                                                                                                                                                                                                                                                                                                         | CT head (noncontrast)<br>CTA head/neck with contrast;<br>MRA head without contrast<br>MRI head (with and without contrast)<br>MRI head (with and without contrast)<br>MRI lumbar spine (with and without contrast) | Back pain without "red flags"<br>Uncomplicated back pain and/or radiculopathy<br>Back pain lasting <4–6 weeks or incomplete trial of therapy<br>Nonsurgical presentation                 |
|                             |                                                                                                                                                                                                 |                                                                                                                                                                                                                                                                                                                                                                                                                                                                                                                                                                                                                                                                                                                                                                                                                                                                                                                                                  | MRI lumbar spine (with and without contrast)                                                                                                                                                                       |                                                                                                                                                                                          |

Continued on next page

**On-line Table 1: Continued**

| Symptom                  | Examples of Diagnostic Guidelines and Clinical Decision Rules                                                                                                                                                                                                                                                                                                                                                                            | Indications for Imaging                                                                                                                                                                                                                                              | First-Line Imaging Modality                                                                                                                                        | Settings in Which Imaging Can Be Avoided (or Insufficient Evidence)           |
|--------------------------|------------------------------------------------------------------------------------------------------------------------------------------------------------------------------------------------------------------------------------------------------------------------------------------------------------------------------------------------------------------------------------------------------------------------------------------|----------------------------------------------------------------------------------------------------------------------------------------------------------------------------------------------------------------------------------------------------------------------|--------------------------------------------------------------------------------------------------------------------------------------------------------------------|-------------------------------------------------------------------------------|
| Syncope or syncope mimic | San Francisco Syncope Rule <sup>80a</sup><br>European Society of Cardiology guidelines, syncope <sup>29</sup><br>AAFP, "Evaluation of Syncope" <sup>31</sup><br>American Academy of Ophthalmology Preferred Practice Pattern Guidelines <sup>34</sup><br>AAFP, "Vision Loss in Older Persons" <sup>35</sup><br>ACR Appropriateness Criteria <sup>36</sup><br>AAO-HNS "Clinical Practice Guideline: Sudden Hearing Loss" <sup>37</sup>    | Signs and symptoms indicate neurologic etiology of syncope (ie, seizure, cerebrovascular accident, posttraumatic)                                                                                                                                                    | Determined by suspected etiology                                                                                                                                   | Routine evaluation of syncopal episode                                        |
| Vision loss              | AAFP, "Evaluation of Syncope" <sup>31</sup><br>American Academy of Ophthalmology Preferred Practice Pattern Guidelines <sup>34</sup><br>AAFP, "Vision Loss in Older Persons" <sup>35</sup><br>ACR Appropriateness Criteria <sup>36</sup><br>AAO-HNS "Clinical Practice Guideline: Sudden Hearing Loss" <sup>37</sup>                                                                                                                     | Sudden onset painless or painful vision loss<br>Proptosis with vision loss<br>Vision loss with uveitis or scleritis<br>Posttraumatic vision loss                                                                                                                     | MRI head/orbits (with and without contrast)<br>MRI head/orbits (with and without contrast)<br>MRI head/orbits (with and without contrast)<br>CT head (noncontrast) | Progressive, atraumatic vision loss without other neurologic signs            |
| Hearing loss             | AAO-HNS "Clinical Practice Guideline: Sudden Hearing Loss" <sup>37</sup>                                                                                                                                                                                                                                                                                                                                                                 | Conductive hearing loss                                                                                                                                                                                                                                              | CT temporal bone (without contrast)<br>MRI head and IAC (with and without contrast)                                                                                | Progressive, symmetric conductive or sensorineural hearing loss               |
| Acute rhinosinusitis     | "IDSA Clinical Practice Guideline for Acute Bacterial Rhinosinusitis in Children and Adults" <sup>39</sup><br>AAO-HNS, "Clinical Practice Guideline (Update): Adult Sinusitis" <sup>40</sup><br>AAFP, "Guidelines for the Diagnosis and Management of Rhinosinusitis in Adults" <sup>41</sup><br>ACR "Appropriateness Criteria: Sinusitis" <sup>42</sup><br>AAO-HNS, "Clinical Practice Guideline: Hoarseness (Dysphonia)" <sup>43</sup> | Unilateral, fluctuating, or unexplained sensorineural hearing loss<br>Acute or subacute sinusitis with suspected orbital and/or intracranial complications<br>Acute or subacute sinusitis in immunocompromised patients<br>Surgical planning for recurrent sinusitis | CT paranasal sinuses (without contrast)<br>CT paranasal sinuses (with and without contrast)<br>CT paranasal sinuses (without contrast)                             | Cases meeting clinical criteria for uncomplicated acute or subacute sinusitis |
| Hoarseness               | AAO-HNS, "Clinical Practice Guideline: Hoarseness (Dysphonia)" <sup>43</sup>                                                                                                                                                                                                                                                                                                                                                             | Persistent hoarseness with unrevealing laryngoscopic examination                                                                                                                                                                                                     | CT or MRI (no clear to evidence to differentiate)                                                                                                                  | Hoarseness before evaluation by direct laryngoscopy                           |

**Note:**—AAP indicates American Academy of Pediatrics; GCS, Glasgow Coma Scale; ACEP/CDC, American College of Emergency Physicians/Centers for Disease Control and Prevention; IDSA, Infectious Diseases Society of America; ACP, American College of Physicians; IAC, internal auditory canal.

<sup>a</sup> Clinical decision rules, which are data-driven clinical research studies (similar to trials) that carry a higher level of evidence than practice and consensus guidelines established by professional groups and societies.

**On-line Table 2: Indications for imaging in pediatric populations**

| Symptom                     | Examples of Diagnostic Guidelines and Clinical Decision Rules                                                                                                                                                                                                                                                                     | Indications for Imaging                                                                                                                                                                                                                                                                                                                                                                           | First-Line Imaging Modality                                                     | Settings in Which Imaging Can Be Avoided (or Insufficient Evidence)                                                 |
|-----------------------------|-----------------------------------------------------------------------------------------------------------------------------------------------------------------------------------------------------------------------------------------------------------------------------------------------------------------------------------|---------------------------------------------------------------------------------------------------------------------------------------------------------------------------------------------------------------------------------------------------------------------------------------------------------------------------------------------------------------------------------------------------|---------------------------------------------------------------------------------|---------------------------------------------------------------------------------------------------------------------|
| Mild traumatic brain injury | Pediatric Emergency Care Applied Research Network rule <sup>45a</sup><br>Children's Head Injury Algorithm for the Prediction of Important Clinical Events rule <sup>46a</sup><br>Canadian Assessment of Tomography for Childhood Head Injury rule <sup>47a</sup><br>ACR Appropriateness Criteria: Head Trauma-Child <sup>48</sup> | Concerning history/examination findings:<br>Witnessed loss of consciousness for >5 min<br>History of amnesia<br>Abnormal drowsiness<br>Severe/worsening headache<br>≥3 Episodes of vomiting<br>Suspicion of nonaccidental injury<br>Posttraumatic seizure<br>GCS < 15 postinjury<br>Depressed skull injury/bulging fontanelle<br>Signs of basilar skull fracture<br>High-risk mechanism of injury | CT head (noncontrast)                                                           | All patients not meeting high-risk signs and symptoms according to clinical criteria                                |
| Acute rhinosinusitis        | "IDSA Clinical Practice Guideline for Bacterial Rhinosinusitis in Children and Adults" <sup>39</sup><br>AAP, clinical practice guideline <sup>50</sup><br>ACR Appropriateness Criteria <sup>51</sup><br>AAP, clinical practice guideline <sup>53</sup><br>ACR Appropriateness Criteria <sup>54</sup>                              | Persistent, recurrent, or chronic sinusitis<br>Acute or subacute sinusitis with suspected orbital and/or intracranial complications                                                                                                                                                                                                                                                               | CT paranasal sinuses (without contrast)<br>CT paranasal sinuses (with contrast) | Cases meeting clinical criteria for uncomplicated acute sinusitis                                                   |
| Simple febrile seizure      |                                                                                                                                                                                                                                                                                                                                   | Complex febrile seizures suspected for meningitis/encephalitis or underlying trauma                                                                                                                                                                                                                                                                                                               | MRI or CT                                                                       | Patients presenting with simple febrile seizures and most complex seizures not meeting high-risk signs and symptoms |

**Note:**—ACP indicates American College of Physicians; GCS, Glasgow Coma Scale; IDSA, Infectious Diseases Society of America; AAP, American Academy of Pediatrics.

<sup>a</sup>Clinical decision rules are data-driven clinical research studies (similar to trials), which carry a higher level of evidence than practice and consensus guidelines established by professional groups and societies.
